# Supplementary material for: On the edge of Bantu expansions: mtDNA, Y chromosome and lactase persistence genetic variation in southwestern Angola
Source: PubMed Central journal article supplement (PMC2682489; doi:10.1186/1471-2148-9-80), 2009-04-21
Supplement: 1471-2148-9-80-S4.pdf [file 1471-2148-9-80-S4.pdf]

## African populations used for mtDNA comparisons.

| Geographic area/Contextual samples; Pop name | Place of origin                     | Linguistic Affiliation | n   | Code in Figure 1 | Reference |
|----------------------------------------------|-------------------------------------|------------------------|-----|------------------|-----------|
| <b>West Africa</b>                           |                                     |                        |     |                  |           |
| Tuareg <sup>1,2,3</sup>                      | Niger                               | Afro-Asiatic           | 23  | 1                | [1]       |
| Songhai <sup>1,2,3</sup>                     | Mali, Niger                         | Nilo-Saharan           | 10  | 2                | [1]       |
| Fulbe <sup>1,2,3</sup>                       | Benin, Burkina Faso, Níger, Nigeria | Niger Congo            | 60  | 3                | [1]       |
| Yoruba <sup>1,2,3</sup>                      | Nigeria                             | Niger-Congo            | 33  | 4                | [1];[2]   |
| Guinea-Bissau (various) <sup>1,2,3</sup>     | Guinea-Bissau                       | Niger-Congo            | 372 | 5                | [3]       |
| Serer <sup>1,2,3</sup>                       | Senegal                             | Niger-Congo            | 23  | 6                | [4]       |
| Wolof <sup>1,2,3</sup>                       | Senegal                             | Niger-Congo            | 48  | 6                | [4]       |
| Senegalese (various) <sup>1,2,3</sup>        | Senegal                             | Niger-Congo            | 50  | 6                | [4]       |
| Mandenka <sup>1,2,3</sup>                    | Senegal                             | Niger-Congo            | 110 | 6                | [5]       |
| Sierra Leone (various) <sup>1,2,3</sup>      | Sierra Leone                        | Niger-Congo            | 276 | 7                | [6]       |
| Cabo Verde <sup>1,2,3</sup>                  | Cabo Verde                          | Creole                 | 292 | 8                | [7]       |
| <b>West-Central Africa</b>                   |                                     |                        |     |                  |           |
| Bamileke <sup>1,2,3</sup>                    | Cameroon                            | Niger-Congo            | 48  | 13               | [8]       |
| Fali <sup>1,3</sup>                          | Cameroon                            | Niger-Congo            | 41  | 13               | [9]       |
| Fulbe <sup>1,2,3</sup>                       | Cameroon                            | Niger-Congo            | 34  | 3                | [9]       |
| Tali <sup>1,3</sup>                          | Cameroon                            | Niger-Congo            | 20  | 13               | [9]       |
| Tupuri <sup>1,3</sup>                        | Cameroon                            | Niger-Congo            | 25  | 13               | [9]       |
| Daba <sup>1,3</sup>                          | Cameroon                            | Afro-Asiatic           | 20  | 13               | [9]       |
| Mandara <sup>1,3</sup>                       | Cameroon                            | Afro-Asiatic           | 37  | 13               | [9]       |
| Podokwo <sup>1,3</sup>                       | Cameroon                            | Afro-Asiatic           | 39  | 13               | [9]       |
| Uldeme <sup>1,3</sup>                        | Cameroon                            | Afro-Asiatic           | 28  | 13               | [9]       |
| Bassa <sup>1,2,3</sup>                       | Cameroon                            | Niger-Congo (Bantu)    | 46  | 13               | [9]       |
| Bakaka <sup>1,2,3</sup>                      | Cameroon                            | Niger-Congo (Bantu)    | 50  | 13               | [9]       |
| Ngumba <sup>1,2,3</sup>                      | Cameroon                            | Niger-Congo (Bantu)    | 88  | 13               | [10]      |
| Fang <sup>1,2,3</sup>                        | Cameroon, Equatorial Guinea, Gabon  | Niger-Congo (Bantu)    | 116 | 14               | [10];[11] |
| Ewondo <sup>1,2,3</sup>                      | Cameroon                            | Niger-Congo (Bantu)    | 78  | 13               | [8];[10]  |
| Bubi <sup>1,2,3</sup>                        | Equatorial Guinea                   | Niger-Congo (Bantu)    | 45  | 16               | [12]      |
| Akele <sup>1,2,3</sup>                       | Gabon                               | Niger-Congo (Bantu)    | 48  | 17               | [10]      |
| Ateke <sup>1,2,3</sup>                       | Gabon                               | Niger-Congo (Bantu)    | 54  | 17               | [10]      |
| Benga <sup>1,2,3</sup>                       | Gabon                               | Niger-Congo (Bantu)    | 50  | 17               | [10]      |
| Dumba <sup>1,2,3</sup>                       | Gabon                               | Niger-Congo (Bantu)    | 47  | 17               | [10]      |
| Eshira <sup>1,2,3</sup>                      | Gabon                               | Niger-Congo (Bantu)    | 40  | 17               | [10]      |
| Eviya <sup>1,2,3</sup>                       | Gabon                               | Niger-Congo (Bantu)    | 38  | 17               | [10]      |
| Galoa <sup>1,2,3</sup>                       | Gabon                               | Niger-Congo (Bantu)    | 51  | 17               | [10]      |
| Kota <sup>1,2,3</sup>                        | Gabon                               | Niger-Congo (Bantu)    | 56  | 17               | [10]      |
| Makina <sup>1,2,3</sup>                      | Gabon                               | Niger-Congo (Bantu)    | 45  | 17               | [10]      |
| Mitsogo <sup>1,2,3</sup>                     | Gabon                               | Niger-Congo (Bantu)    | 64  | 17               | [10]      |
| Ndumu <sup>1,2,3</sup>                       | Gabon                               | Niger-Congo (Bantu)    | 39  | 17               | [10]      |
| Nzebi <sup>1,2,3</sup>                       | Gabon                               | Niger-Congo (Bantu)    | 63  | 17               | [10]      |
| Obamba <sup>1,2,3</sup>                      | Gabon                               | Niger-Congo (Bantu)    | 47  | 17               | [10]      |
| Orungu <sup>1,2,3</sup>                      | Gabon                               | Niger-Congo (Bantu)    | 20  | 17               | [10]      |
| Punu <sup>1,2,3</sup>                        | Gabon                               | Niger-Congo (Bantu)    | 52  | 17               | [10]      |
| Shake <sup>1,2,3</sup>                       | Gabon                               | Niger-Congo (Bantu)    | 51  | 17               | [10]      |
| <b>Pygmies</b>                               |                                     |                        |     |                  |           |
| Babongo Pygmies <sup>1,2,3</sup>             | Gabon                               | Niger-Congo            | 45  | 20               | [10]      |

|                                           |                          |                            |            |           |                             |
|-------------------------------------------|--------------------------|----------------------------|------------|-----------|-----------------------------|
| Baka Pygmies <sup>1,2,3</sup>             | Cameroon, Gabon          | Niger-Congo                | 127        | 21        | [10]                        |
| Bakola Pygmies <sup>1,2,3</sup>           | Cameroon                 | Niger-Congo                | 118        | 22        | [10];[13]                   |
| Bakoya Pygmies <sup>1,2,3</sup>           | Gabon                    | Niger-Congo                | 31         | 23        | [10]                        |
| Biaka Pygmies <sup>1,2,3</sup>            | Central African Republic | Niger-Congo                | 73         | 24        | [2];[10]                    |
| Mbenzele Pygmies <sup>1,2,3</sup>         | Central African Republic | Niger-Congo                | 57         | 25        | [8]                         |
| Tikar Pygmies <sup>1,2,3</sup>            | Cameroon                 | Niger-Congo                | 35         | 26        | [10]                        |
| <b>East Africa</b>                        |                          |                            |            |           |                             |
| Ethiopia <sup>1,2,3</sup>                 | Ethiopia                 | Afro-Asiatic               | 270        | 27        | [14]                        |
| Somali <sup>1,2,3</sup>                   | Somalia                  | Afro-Asiatic               | 27         | 28        | [1]                         |
| Burunge <sup>1,2,3</sup>                  | Tanzania                 | Afro-Asiatic               | 38         | 29        | [13]                        |
| Turkana <sup>1,2,3</sup>                  | Kenya                    | Nilo-Saharan               | 37         | 30        | [1]                         |
| Nairobi <sup>2</sup>                      | Kenya                    | Niger-Congo                | 100        | 31        | [15]                        |
| Luo <sup>1,2,3</sup>                      | Kenya                    | Nilo-Saharan               | 53         | 32        | Luiselli et al, unpublished |
| Nubian <sup>1,2,3</sup>                   | Nubia                    | Nilo-Saharan               | 80         | 33        | [16]                        |
| Sudanese <sup>1,2,3</sup>                 | Sudan                    | Nilo-Saharan               | 76         | 34        | [16]                        |
| Kikuyu <sup>2</sup>                       | Kenya                    | Niger-Congo (Bantu)        | 24         | 35        | [1]                         |
| Turu <sup>2</sup>                         | Tanzania                 | Niger-Congo (Bantu)        | 29         | 36        | [13]                        |
| Iraqw <sup>1,2,3</sup>                    | Tanzania                 | Afro-Asiatic               | 12         | 37        | [17]                        |
| Datog <sup>1,2,3</sup>                    | Tanzania                 | Nilo-Saharan               | 57         | 38        | [13]; [17]                  |
| Sukuma <sup>2</sup>                       | Tanzania                 | Niger-Congo (Bantu)        | 32         | 39        | [13];[17]                   |
| Hadza <sup>1,2</sup>                      | Tanzania                 | Khoisan                    | 145        | 42        | [2];[13];[17]               |
| Sandawe <sup>1,2</sup>                    | Tanzania                 | Khoisan                    | 82         | 43        | [13]                        |
| <b>Southwest Africa</b>                   |                          |                            |            |           |                             |
| Cabinda (Kikongo) <sup>1,2</sup>          | Angola                   | Niger-Congo (Bantu)        | 109        | 44        | [18]                        |
| Luanda (Kimbundu) <sup>1,2</sup>          | Angola                   | Niger-Congo (Bantu)        | 44         | 45        | [19]                        |
| <b>Namibe (various)<sup>1,2,3,4</sup></b> | <b>Angola</b>            | <b>Niger-Congo (Bantu)</b> | <b>365</b> | <b>46</b> | <b>Present study</b>        |
| <b>Southeast Africa</b>                   |                          |                            |            |           |                             |
| Shona <sup>1,2,4</sup>                    | Zimbabwe                 | Niger-Congo (Bantu)        | 61         | 48        | Luiselli et al, unpublished |
| Mozambique (various) <sup>1,2</sup>       | Mozambique               | Niger-Congo (Bantu)        | 109        | 47        | [20]                        |
| Mozambique (various) <sup>1,2,4</sup>     | Mozambique               | Niger-Congo (Bantu)        | 307        | 47        | [21]                        |
| <b>Southern Africa Khoisans</b>           |                          |                            |            |           |                             |
| !Kung <sup>1,2,3</sup>                    | Botswana, South Africa   | Khoisan                    | 68         | 49        | [2];[22]                    |
| Khwe <sup>1,2,3</sup>                     | South Africa             | Khoisan                    | 31         | 50        | [22]                        |
| !Xun/Khwe <sup>1,2,3</sup>                | South Africa             | Khoisan                    | 18         | 50        | [13]                        |

<sup>1</sup>Population sample used in haplogroup frequency analyses (pie charts and PC analysis);

<sup>2</sup>Population sample used in Lineage sharing analysis;

<sup>3</sup>Population sample used in admixture analyses;

<sup>4</sup>Population sample used in IM model and estimation of demographic parameters.

## References:

1. Watson E, Bauer K, Aman R, Weiss G, von Haeseler A, Pääbo S: **mtDNA sequence diversity in Africa.** *Am J Hum Genet* 1996, **59**:437-444.
2. Vigilant L, Stoneking M, Harpending H, Hawkes K, Wilson AC: **African populations and the evolution of human mitochondrial DNA.** *Science* 1991, **253**:1503-1507.
3. Rosa A, Brehm A, Kivisild T, Metspalu E, Villems R: **MtDNA profile of West Africa Guineans: towards a better understanding of the Senegambia region.** *Ann Hum Genet* 2004, **68**: 340-352.
4. Rando JC, Pinto F, González AM, Hernández M, Larruga JM, Cabrera VM, Bandelt HJ: **Mitochondrial DNA analysis of northwest African populations reveals genetic exchanges with European, near-eastern, and sub-Saharan populations.** *Ann Hum Genet* 1998, **62**:531-550.

5. Graven L, Passarino G, Semino O, Boursot P, Santachiara-Benerecetti S, Langaney A, Excoffier L: **Evolutionary correlation between control region sequence and restriction polymorphisms in the mitochondrial genome of a large Senegalese Mandenka sample.** *Mol Biol Evol* 1995, **12**: 334-345.
6. Jackson BA, Wilson JL, Kirbah S, Sidney SS, Rosenberger J, Bassie L, Alie JA, McLean DC, Garvey WT, Ely B: **Mitochondrial DNA genetic diversity among four ethnic groups in Sierra Leone.** *Am J Phys Anthropol* 2005, **128**: 156-163.
7. Brehm A, Pereira L, Bandelt HJ, Prata MJ, Amorim A: **Mitochondrial portrait of the Cabo Verde archipelago: the Senegambian outpost of Atlantic slave trade.** *Ann Hum Genet* 2002, **66**: 49-60.
8. Destro-Bisol G, Coia V, Boschi I, Verginelli F, Cagliá A, Pascali V, Spedini G, Calafell F: **The analysis of variation of mtDNA hypervariable region 1 suggests that Eastern and Western Pygmies diverged before the Bantu expansion.** *Am Nat* 2004, **163**: 212-226.
9. Coia V, Destro-Bisol G, Verginelli F, Battaglia C, Boschi I, Cruciani F, Spedini G, Comas D, Calafell F: **Brief communication: mtDNA variation in North Cameroon: Lack of Asian lineages and implications for back migration from Asia to sub-Saharan Africa.** *Am J Phys Anthropol* 2005, **128**: 678-681.
10. Quintana-Murci L, Quach H, Harmant C, Luca F, Massonnet B, Patin E, Sica L, Mouguiama-Daouda P, Comas D, Tzur S, Balanovsky O, Kidd KK, Kidd JR, van der Veen L, Hombert JM, Gessain A, Verdu P, Froment A, Bahuchet S, Heyer E, Dausset J, Salas A, Behar DM: **Maternal traces of deep common ancestry and asymmetric gene flow between Pygmy hunter-gatherers and Bantu-speaking farmers.** *Proc Natl Acad Sci U S A* 2008, **105**: 1596-1601.
11. Pinto F, Gonzalez AM, Hernandez M, Larruga JM, Cabrera VM: **Genetic relationship between the Canary Islanders and their African and Spanish ancestors inferred from mitochondrial DNA sequences.** *Ann Hum Genet* 1996, **60**: 321-330.
12. Mateu E, Comas D, Calafell F, Pérez-Lezaun A, Abade A, Bertranpetit J: **A tale of two islands: Population history and mitochondrial DNA sequence variation of Bioko and São Tomé, Gulf of Guinea.** *Ann Hum Genet* 1997, **61**: 507-518.
13. Tishkoff SA, Gonder MK, Henn BM, Mortensen H, Knight A, Gignoux C, Fernandopulle N, Lema G, Nyambo TB, Ramakrishnan U, Reed FA, Mountain JL: **History of click-speaking populations of Africa inferred from mtDNA and Y chromosome genetic variation.** *Mol Biol Evol* 2007, **24**: 2180-2195.
14. Kivisild T, Reidla M, Metspalu E, Rosa A, Brehm A, Pennarun E, Parik J, Geberhiwot T, Usanga E, Villems R: **Ethiopian mitochondrial DNA heritage: Tracking gene flow across and around the gate of tears.** *Am J Hum Genet* 2004, **75**: 752-770.
15. Brandstätter A, Peterson CT, Irwin JA, Mpoke S, Koech DK, Parson W, Parsons TJ: **Mitochondrial DNA control region sequences from Nairobi (Kenya): inferring phylogenetic parameters for the establishment of a forensic database.** *Int J Legal Med* 2004, **118**: 294-306.
16. Krings M, Salem AE, Bauer K, Geisert H, Malek AK, Chaix L, Simon C, Welsby D, Di Rienzo A, Utermann G, Sajantila A, Pääbo S, Stoneking M: **mtDNA analysis of Nile River Valley populations: A genetic corridor or a barrier to migration?** *Am J Hum Genet* 1999, **64**: 1166-1176.
17. Knight A, Underhill PA, Mortensen HM, Zhivotovsky LA, Lin AA, Henn BM, Louis D, Ruhlen M, Mountain JL: **African Y chromosome and mtDNA divergence provides insight into the history of click languages.** *Curr Biol* 2003, **13**: 464-473.
18. Belezá S, Gusmão L, Amorim A, Carracedo A, Salas A: **The genetic legacy of western Bantu migrations.** *Hum Genet* 2005, **117**: 366-375.
19. Plaza S, Salas A, Calafell F, Corte-Real F, Bertranpetit J, Carracedo A, Comas D: **Insights into the western Bantu dispersal: mtDNA lineage analysis in Angola.** *Hum Genet* 2004 **115**: 439-447.
20. Pereira L, Macaulay V, Torroni A, Scozzari R, Prata MJ, Amorim A: **Prehistoric and historic traces in the mtDNA of Mozambique: insights into the Bantu expansions and the slave trade.** *Ann Hum Genet* 2001, **65**: 439-458.
21. Salas A, Richards M, Lareu MV, Scozzari R, Coppa A, Torroni A, Macaulay V, Carracedo A: **The making of the African mtDNA landscape.** *Am J Hum Genet* 2002, **71**: 1082-1111.
22. Chen YS, Olckers A, Schurr TG, Kogelnik AM, Huoponen K, Wallace DC: **mtDNA variation in the South African Kung and Khwe and their genetic relationships to other African populations.** *Am J Hum Genet* 2000, **66**: 1362-1383.
