# Supplementary material for: On the edge of Bantu expansions: mtDNA, Y chromosome and lactase persistence genetic variation in southwestern Angola
Source: PubMed Central journal article supplement (PMC2682489; doi:10.1186/1471-2148-9-80), 2009-04-21
Supplement: 1471-2148-9-80-S5.pdf [file 1471-2148-9-80-S5.pdf]

## African populations used for Y-chromosome comparisons

| Geographic area/Contextual samples;<br>Pop name | Place of origin             | Linguistic Affiliation | n   | Code in<br>Figure1 | Reference |
|-------------------------------------------------|-----------------------------|------------------------|-----|--------------------|-----------|
| <i>West Africa</i>                              |                             |                        |     |                    |           |
| Tuareg <sup>2,3</sup>                           | Niger                       | Afro-Asiatic           | 9   | 1                  | [1]       |
| Songhai <sup>2,3</sup>                          | Niger                       | Nilo-Saharan           | 5   | 2                  | [1]       |
| Fon <sup>1</sup>                                | Benin                       | Niger-Congo            | 100 | 9                  | [2]       |
| Rimaibe <sup>1</sup>                            | Burkina Faso                | Niger Congo            | 37  | 10                 | [3]       |
| Fulbe <sup>1</sup>                              | Burkina Faso                | Niger-Congo            | 20  | 3                  | [3]       |
| Fulbe <sup>2,3</sup>                            | Niger                       | Niger-Congo            | 6   | 3                  | [1]       |
| Mossi <sup>1</sup>                              | Burkina Faso                | Niger-Congo            | 49  | 11                 | [3]       |
| Guinea Bissau (various) <sup>2,3</sup>          | Guinea Bissau               | Niger-Congo            | 203 | 5                  | [4],[5]   |
| Guinea Bissau (various) <sup>1</sup>            | Guinea Bissau               | Niger-Congo            | 232 | 5                  | [6]       |
| Mali (various) <sup>1</sup>                     | Mali                        | - <sup>5</sup>         | 44  | 12                 | [7]       |
| Yoruba <sup>1,2,3</sup>                         | Nigeria                     | Niger-Congo            | 13  | 4                  | [8]       |
| Senegal (various) <sup>1</sup>                  | Senegal                     | Niger-Congo            | 139 | 6                  | [9]       |
| <i>West-Central Africa</i>                      |                             |                        |     |                    |           |
| Bamileke <sup>2,3</sup>                         | Cameroon                    | Niger-Congo            | 53  | 13                 | [10]      |
| Bamileke <sup>1</sup>                           | Cameroon                    | Niger-Congo            | 133 | 13                 | [2],[3]   |
| Bakaka <sup>1</sup>                             | Cameroon                    | Niger-Congo (Bantu)    | 12  | 13                 | [3]       |
| Cameroon (various) <sup>1</sup>                 | Cameroon                    | Niger-Congo (Bantu)    | 14  | 13                 | [2]       |
| Daba <sup>1</sup>                               | Cameroon                    | Afro-Asiatic           | 18  | 13                 | [3]       |
| Ewondo <sup>2,3</sup>                           | Cameroon                    | Niger-Congo (Bantu)    | 20  | 13                 | [10]      |
| Ewondo <sup>1</sup>                             | Cameroon                    | Niger-Congo (Bantu)    | 29  | 13                 | [3]       |
| Tali <sup>1</sup>                               | Cameroon                    | Niger-Congo            | 15  | 13                 | [3]       |
| Fali <sup>1</sup>                               | Cameroon                    | Niger-Congo            | 39  | 13                 | [3]       |
| Fulbe <sup>1</sup>                              | Cameroon                    | Niger-Congo            | 17  | 3                  | [3]       |
| Mixed Adamawa <sup>1</sup>                      | Cameroon                    | Niger-Congo            | 18  | 13                 | [3]       |
| Mixed Chadic <sup>1</sup>                       | Cameroon                    | Afro-Asiatic           | 15  | 13                 | [3]       |
| Mixed Nilo-Saharan <sup>1</sup>                 | Cameroon                    | Nilo-Saharan           | 9   | 13                 | [3]       |
| Ouldeme <sup>1</sup>                            | Cameroon                    | Afro-Asiatic           | 21  | 13                 | [3]       |
| Bangui <sup>2,3</sup>                           | Central African<br>Republic | Niger-Congo            | 122 | 18                 | [11]      |
| Lissongo <sup>2,3</sup>                         | Central African<br>Republic | Niger-Congo (Bantu)    | 4   | 19                 | [1]       |
| Bubi <sup>2,3</sup>                             | Equatorial Guinea           | Niger-Congo (Bantu)    | 133 | 16                 | [12]      |
| Fang <sup>2,3</sup>                             | Equatorial Guinea           | Niger-Congo (Bantu)    | 110 | 14                 | [12]      |
| Equatorial Guinea (various) <sup>2,3</sup>      | Equatorial Guinea           | Niger Congo            | 101 | 15                 | [13]      |
| <i>Pygmies</i>                                  |                             |                        |     |                    |           |
| Biaka Pygmies <sup>1</sup>                      | Central African<br>Republic | Niger-Congo            | 20  | 24                 | [3]       |
| Biaka Pygmies <sup>2,3</sup>                    | Central African<br>Republic | Niger-Congo            | 8   | 24                 | [8]       |
| Pygmies <sup>2,3</sup>                          | Central African<br>Republic | Niger-Congo            | 20  | 24                 | [1]       |
| <i>East Africa</i>                              |                             |                        |     |                    |           |
| Ethiopian Nilo-Saharan <sup>2,3</sup>           | Ethiopia                    | Nilo-Saharan           | 40  | 27                 | [1]       |
| Ethiopian Afro-Asiatic <sup>2,3</sup>           | Ethiopia                    | Afro-Asiatic           | 44  | 27                 | [1]       |
| Ethiopians <sup>1</sup>                         | Ethiopia                    | Afro-Asiatic           | 126 | 27                 | [9]       |

|                                           |               |                            |            |           |                      |
|-------------------------------------------|---------------|----------------------------|------------|-----------|----------------------|
| Ethiopia (various) <sup>1</sup>           | Ethiopia      | - <sup>5</sup>             | 88         | 27        | [7]                  |
| Somalia (various) <sup>2,3</sup>          | Somalia       | - <sup>5</sup>             | 201        | 28        | [15]                 |
| Burunge <sup>1,2,3</sup>                  | Tanzania      | Afro-Asiatic               | 24         | 29        | [8]                  |
| Sudan (various) <sup>1</sup>              | Sudan         | - <sup>5</sup>             | 40         | 34        | [7]                  |
| Turu <sup>2</sup>                         | Tanzania      | Niger-Congo (Bantu)        | 20         | 36        | [8]                  |
| Iraqw <sup>1</sup>                        | Tanzania      | Afro-Asiatic               | 6          | 37        | [16]                 |
| Datog <sup>1,2,3</sup>                    | Tanzania      | Nilo-Saharan               | 35         | 38        | [8]                  |
| Sukuma <sup>2</sup>                       | Tanzania      | Niger-Congo (Bantu)        | 30         | 39        | [8]                  |
| Mbugwe <sup>2</sup>                       | Tanzania      | Niger-Congo (Bantu)        | 14         | 40        | [8]                  |
| Maasai <sup>1</sup>                       | Kenya         | Nilo-Saharan               | 26         | 41        | [14]                 |
| Hadzabe <sup>1,2</sup>                    | Tanzania      | Khoisan                    | 54         | 42        | [8]                  |
| Hadzabe <sup>1</sup>                      | Tanzania      | Khoisan                    | 23         | 42        | [16]                 |
| Sandawe <sup>1,2</sup>                    | Tanzania      | Khoisan                    | 67         | 43        | [8]                  |
| <b>Southwest Africa</b>                   |               |                            |            |           |                      |
| Cabinda (various) <sup>1,2</sup>          | Angola        | Niger-Congo (Bantu)        | 74         | 44        | [17]                 |
| Luanda (various) <sup>2</sup>             | Angola        | Niger-Congo (Bantu)        | 50         | 45        | [5]                  |
| <b>Namibe (various)<sup>1,2,3,4</sup></b> | <b>Angola</b> | <b>Niger-Congo (Bantu)</b> | <b>236</b> | <b>46</b> | <b>Present study</b> |
| <b>Southeast Africa</b>                   |               |                            |            |           |                      |
| Mozambique (various) <sup>2,4</sup>       | Mozambique    | Niger-Congo (Bantu)        | 112        | 47        | [18]                 |
| <b>South African</b>                      |               |                            |            |           |                      |
| Omega San <sup>2,3</sup>                  | Namibia       | Khoisan                    | 15         | 51        | [1]                  |
| Sekele San <sup>2,3</sup>                 | South Africa  | Khoisan                    | 14         | 51        | [1]                  |
| San <sup>2,3</sup>                        | South Africa  | Khoisan                    | 8          | 51        | [8]                  |
| !Kung <sup>1</sup>                        | South Africa  | Khoisan                    | 64         | 49        | [3]                  |
| Kwe <sup>1</sup>                          | South Africa  | Khoisan                    | 26         | 50        | [3]                  |

<sup>1</sup>Population sample used in haplogroup frequency analyses (pie charts and PC analysis);

<sup>2</sup>Population sample used in lineage sharing analysis;

<sup>3</sup>Population sample used in admixture analyses;

<sup>4</sup>Population sample used in IM model and estimation of demographic parameters.

<sup>5</sup>Linguistic Affiliation was not mentioned in the reference

## References:

1. Pritchard JK, Seielstad M, Perez-Lezaun A, Feldman M: **Population Growth of Human Y Chromosomes: A Study of Y Chromosome Microsatellites.** *Mol Biol Evol* 1999, **16**: 1791-1798.
2. Luis JR, Rowold DJ, Regueiro M, Caeiro B, Cinnioglu C, Roseman C, Underhill PA, Cavalli-Sforza LL, Herrera RJ: **The Levant versus the Horn of Africa: evidence for bidirectional corridors of human migrations.** *Am J Hum Genet* 2004, **74**: 532-544.
3. Cruciani F, Santolamazza P, Shen P, Macaulay V, Moral P, Olckers A, Modiano D, Holmes S, Destro-Bisol G, Coia V, Wallace DC, Oefner PJ, Torroni A, Cavalli-Sforza LL, Scozzari R, Underhill PA: **A back migration from Asia to sub-Saharan Africa is supported by high-resolution analysis of human Y-chromosome haplotypes.** *Am J Hum Genet* 2002, **70**:1197-1214.
4. Rosa A, Ornelas C, Jobling MA, Brehm A, Villems R: **Y-chromosomal diversity in the population of Guinea-Bissau: a multiethnic perspective.** *BMC Evol Biol* 2007, **7**: 124.
5. Côrte-Real F, Carvalho M, Andrade L, Anjos MJ, Pestoni C, Lareu MV, Carracedo A, Vieira DN, Vide MC: **Chromosome Y STRs analysis and evolutionary aspects for Portuguese spoken countries.** In *Progress in forensic Genetics 8; Amsterdam.* Edited by Sensabaugh, G F P, Lincoln J, Olaisen, B: Elsevier Science; 2000: 272-274.
6. Gonçalves R, Rosa A, Freitas A, Fernandes A, Kivisild T, Villems R, Brehm A: **Y-chromosome lineages in Cabo Verde Islands witness the diverse geographic origin of its first male settlers.** *Hum Genet* 2003, **113**: 467-472.

7. Underhill PA, Shen P, Lin AA, Jin L, Passarino G, Yang WH, Kauffman E, Bonne-Tamir B, Bertranpetit J, Francalacci P, Ibrahim M, Jenkins T, Kidd JR, Mehdi SQ, Seielstad MT, Wells RS, Piazza A, Davis RW, Feldman MW, Cavalli-Sforza LL, Oefner PJ: **Y chromosome sequence variation and the history of human populations.** *Nat Genet* 2000, **26**: 358–361.
8. Tishkoff SA, Gonder MK, Henn BM, Mortensen H, Knight A, Gignoux C, Fernandopulle N, Lema G, Nyambo TB, Ramakrishnan U, Reed FA, Mountain JL: **History of click-speaking populations of Africa inferred from mtDNA and Y chromosome genetic variation.** *Mol Biol Evol* 2007, **24**: 2180-2195.
9. Semino O, Santachiara-Benerecetti AS, Falaschi F, Cavalli-Sforza LL, Underhill PA: **Ethiopians and Khoisan share the deepest clades of the human Y-chromosome phylogeny.** *Am J Hum Genet* 2002, **70**:265–268.
10. Caglià A, Tofanelli S, Coia V, Boschi I, Pescarmona M, Spedini G, Pascali V, Paoli G, Destro-Bisol G: **A study of Y-chromosome microsatellite variation in sub-Saharan Africa: a comparison between F(ST) and R(ST) genetic distances.** *Hum Biol* 2003, **75**: 313-330.
11. Lecerf M, Filali M, Grésenguet G, Ndjoyi-Mbiguino A, Le Goff J, de Mazancourt P, Bélec L: **Allele frequencies and haplotypes of eight Y-short tandem repeats in Bantu population living in Central Africa.** *Forensic Sci Int* 2007, **171**: 212-215.
12. Barrot C, Sánchez C, Xifró A, Ortega M, Mas J, Hugué E, Corbella J, Gené M: **Data for Y-chromosome haplotypes in Fang and Bubi populations from Bioko (Equatorial Guinea).** *Forensic Sci Int* 2007, **168**: e10-12.
13. Arroyo-Pardo E, Gusmão L, López-Parra AM, Baeza C, Mesa MS, Amorim A: **Genetic variability of 16 Y-chromosome STRs in a sample from Equatorial Guinea (Central Africa).** *Forensic Sci Int* 2005, **149**: 109-113.
14. Wood ET, Stover DA, Ehret C, Destro-Bisol G, Spedini G, McLeod H, Louie L, Bamshad M, Strassmann BI, Soodyall H, Hammer MF: **Contrasting patterns of Y chromosome and mtDNA variation in Africa: evidence for sex-biased demographic processes.** *Eur J Hum Genet* 2005, **13**: 867-876.
15. Hallenberg C, Simonsen B, Sanchez J, Morling N: **Y-chromosome STR haplotypes in Somalis.** *Forensic Sci Int* 2005, **151**: 317-321.
16. Knight A, Underhill PA, Mortensen HM, Zhivotovsky LA, Lin AA, Henn BM, Louis D, Ruhlen M, Mountain JL: **African Y chromosome and mtDNA divergence provides insight into the history of click languages.** *Curr Biol* 2003, **13**: 464-473.
17. Beleza S: **Phylogenetic and demographic history of two human populations revealed by the analysis of two non-recombining segments of the genome: Y-chromosome and mitochondrial DNA.** *PhD thesis.* Santiago Compostela University, 2005
18. Alves C, Gusmão L, Barbosa J, Amorim A: **Evaluating the informative power of Y-STRs: a comparative study using European and new African haplotype data.** *Forensic Sci Int* 2003, **134**: 126-133.
