# Supplementary material for: On the edge of Bantu expansions: mtDNA, Y chromosome and lactase persistence genetic variation in southwestern Angola
Source: PubMed Central journal article supplement (PMC2682489; doi:10.1186/1471-2148-9-80), 2009-04-21
Supplement: 1471-2148-9-80-S7.pdf [file 1471-2148-9-80-S7.pdf]

### L0a (L0a1+L0a2)

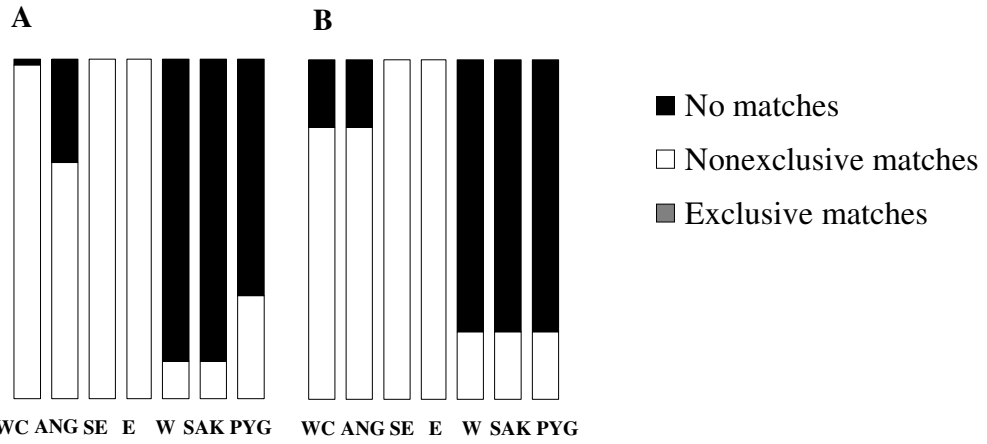

### L0a1

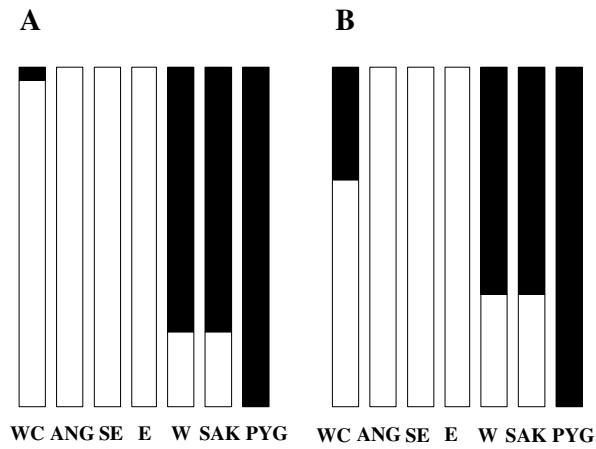

### L0a2

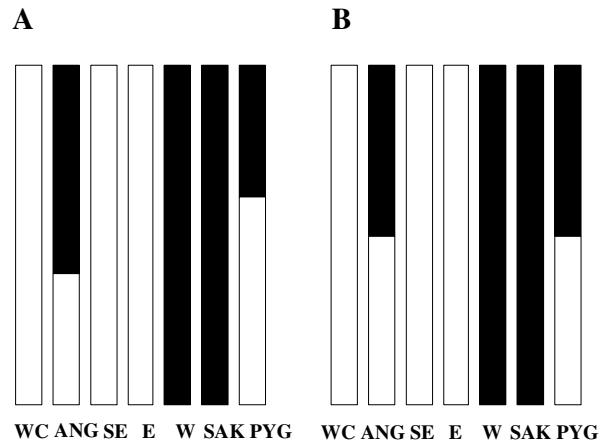

**L1c**

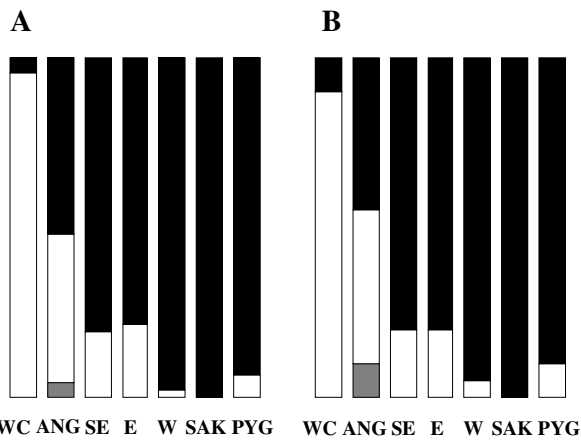

**L2a**

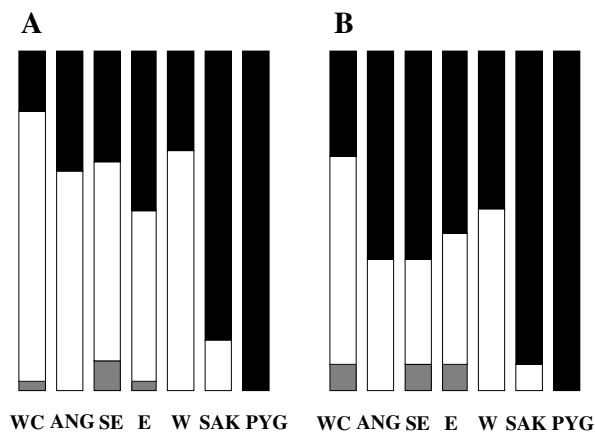

**L3e**

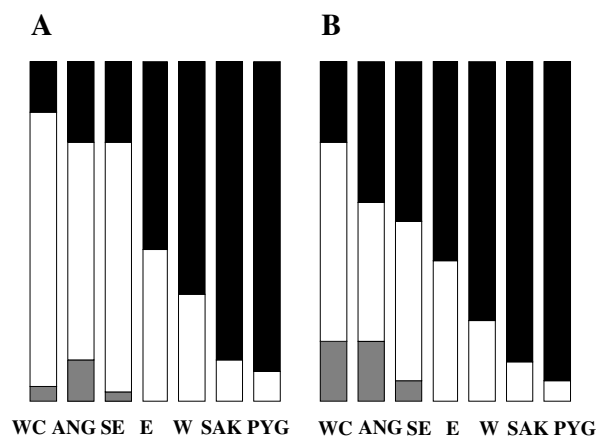

**L3f**

**A**

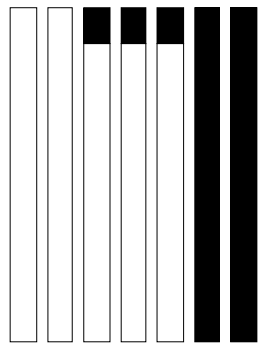

WC ANG SE E W SAK PYG

**B**

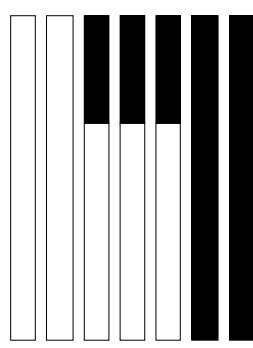

WC ANG SE E W SAK PYG
