# Supplementary material for: On the edge of Bantu expansions: mtDNA, Y chromosome and lactase persistence genetic variation in southwestern Angola
Source: PubMed Central journal article supplement (PMC2682489; doi:10.1186/1471-2148-9-80), 2009-04-21

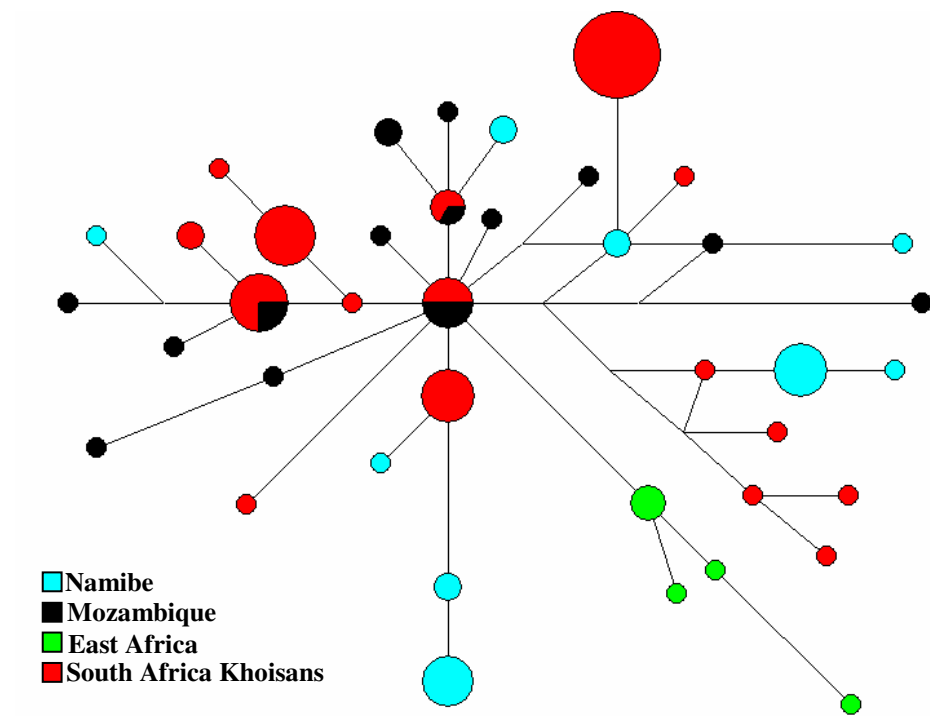

Supplement: 1471-2148-9-80-S8.pdf [file 1471-2148-9-80-S8.pdf]
